# Supplementary material for: The Polyphenolic Profile and Antioxidant Activity of Five Vegetal Extracts with Hepatoprotective Potential
Source: MDPI journal article supplement (doi:10.3390/plants11131680), 2022-06-24
Supplement: s1 [file s1]

## Article

## The Polyphenolic Profile and Antioxidant Activity of Five Vegetal Extracts with Hepatoprotective Potential

## Supplementary material

RT: 0.00 - 34.01

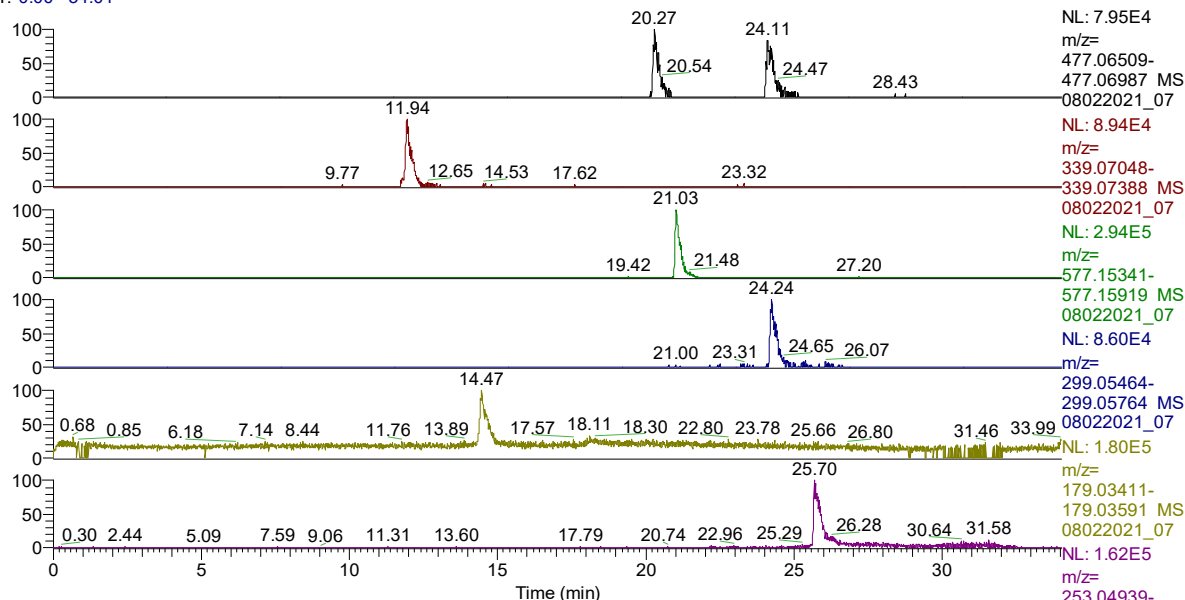

**Figure S1.** UHPLC-HRMS/MS chromatogram for CE in which were identified (top to bottom): quercetin-3-O-glucuronide (m/z: 477.06748, Rt: 20.27/24.11), esculetin-7-glucoside (m/z: 339.07218, Rt: 11.94), apigenin-7-rutinoside (m/z: 577.15630, Rt: 21.03), pratensein (m/z: 299.05614, Rt: 24.24), caffeic acid (m/z: 179.03501, Rt: 14.47), chrysin (m/z: 253.05066, Rt: 25.70).

RT: 0.00 - 34.01

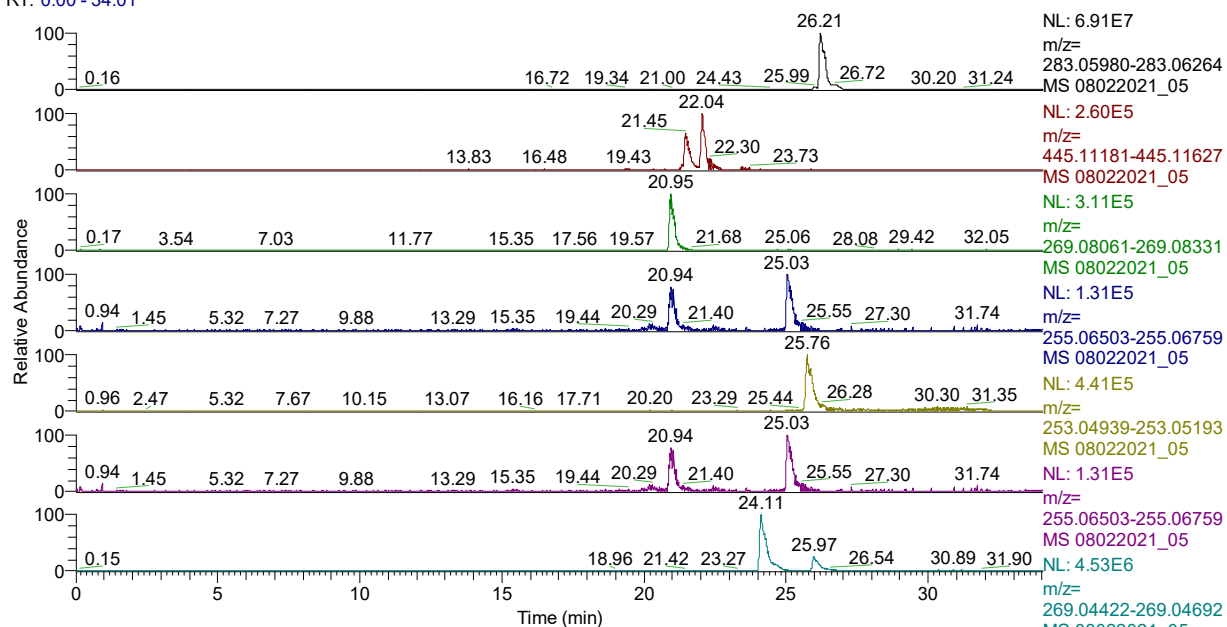

**Figure S2.** UHPLC-HRMS/MS chromatogram (a) for RE in which were identified (top to bottom): biochanin A (m/z: 283.06122, Rt: 26.21), sissotrin/biochanin A-7-O-β-D-glucoside (m/z: 445.11404, Rt: 22.04), medicarpin (m/z: 269.08196, Rt: 20.95), pinocembrin (m/z: 255.06631, Rt: 25.03), chrysin (m/z: 253.05066, Rt: 25.76), liquiritigenin/isoliquiritigenin (m/z: 255.06631, Rt: 20.94/25.03), galangin (m/z: 269.04930, Rt: 24.11).

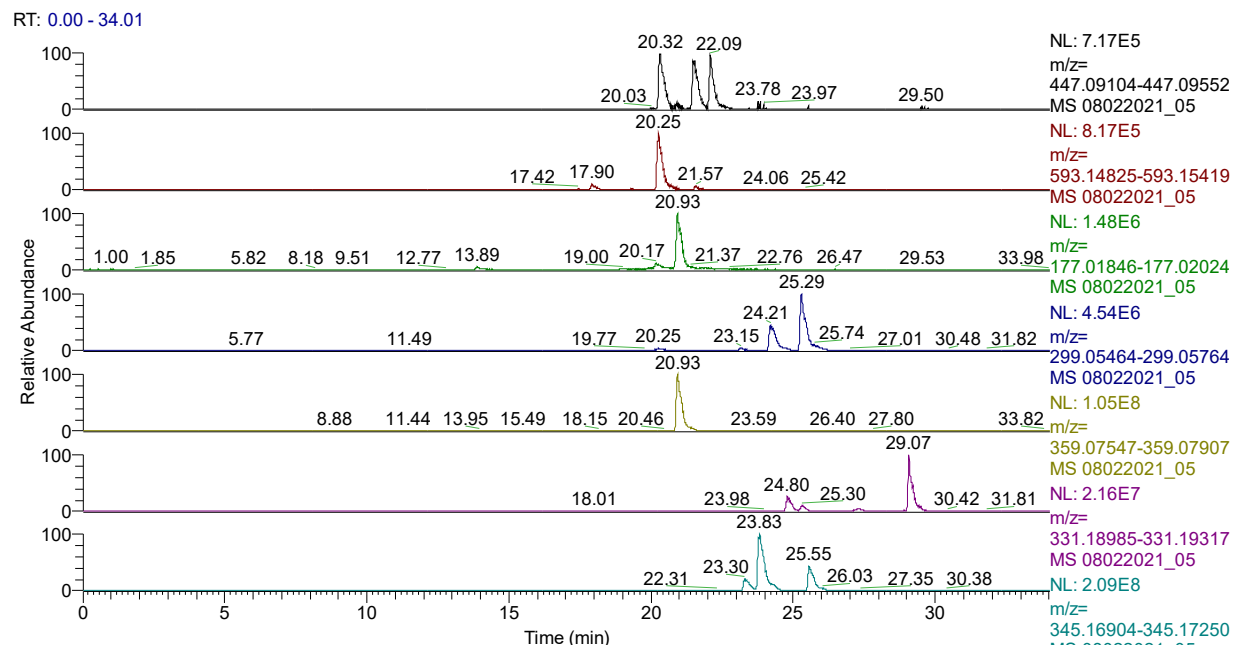

**Figure S3.** UHPLC-HRMS/MS chromatogram (b) for **RE** in which were identified (top to bottom): kaempferol (or luteolin)-O-glucoside/isomers (m/z: 447.09331, Rt: 20.32/22.09/21.57), scolimoside (m/z: 593.15121, Rt: 20.25), aesculetin (m/z: 177.01935, Rt: 20.93), chrysoeriol (m/z: 299.05614, Rt: 25.29) pratensein (m/z: 299.05614, Rt: 24.21), rosmarinic acid (m/z: 359.07726, Rt: 20.93), carnosic acid (m/z: 331.19150, Rt: 29.07), rosmanol (m/z: 345.17077, Rt: 23.83/25.55).

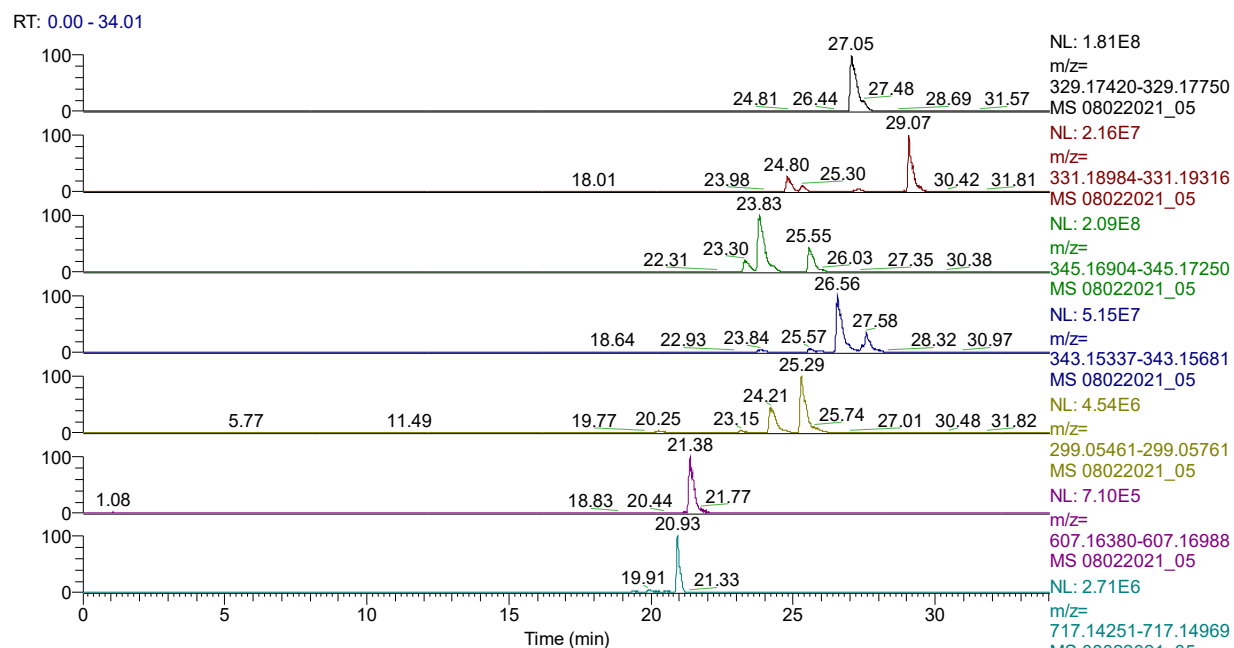

**Figure S4.** UHPLC-HRMS/MS chromatogram (c) for **RE** in which were identified (top to bottom): carnosol (m/z: 329.17585, Rt: 27.05), carnosic acid (m/z: 331.19150, Rt: 29.07), rosmanol (m/z: 345.17077, Rt: 23.83/25.55), rosmadial (m/z: 343.15509, Rt: 26.56/27.58), diosmetin (m/z: 299.05611, Rt: 25.29), diosmetin-7-O-rutinoside/diosmin (m/z: 607.16684, Rt: 21.38), salvianolic acid B (m/z: 717.14610, Rt: 20.93).

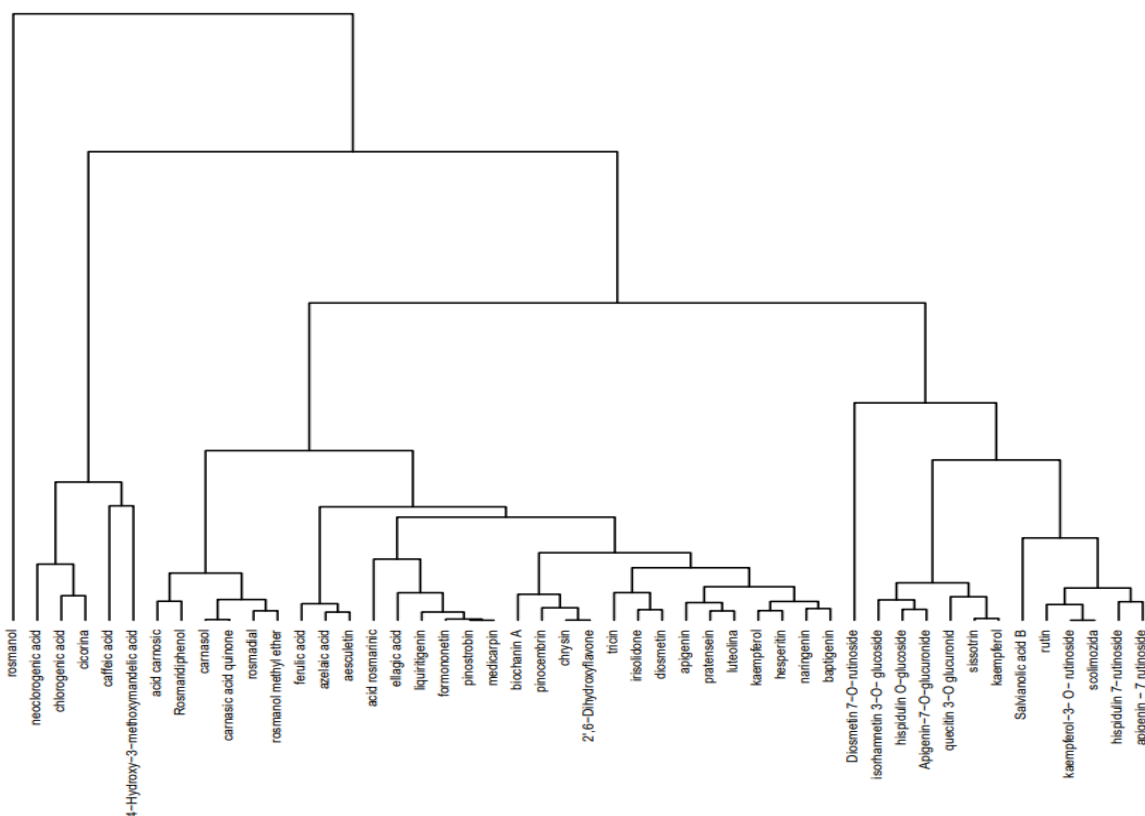

**Figure S5.** Dendrogram for RE compounds representative for the profile of polyphenolic derivatives obtained by the hierarchical grouping method Ward, HCA (Hierarchical Cluster Analysis).

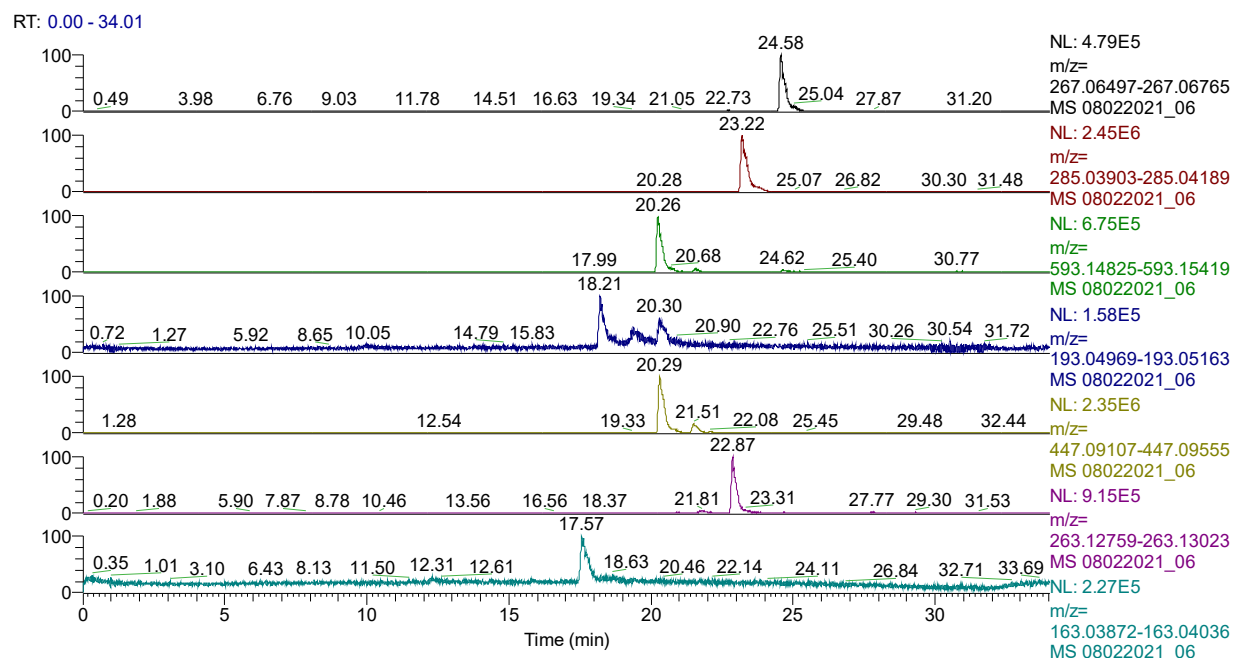

**Figure S6.** UHPLC-HRMS/MS chromatogram (a) of TE in which were identified (top to bottom): formononetin (m/z: 267.06631, Rt: 24.58), baptigenin (m/z: 285.04046, Rt: 23.22), kaempferol-3-O-rutinoside (m/z: 593.15122, Rt: 20.26), ferulic acid (m/z: 193.05066, Rt: 18.21), kaempferol (or luteolin)-O-glucoside (m/z: 447.09331, Rt: 20.29), abscisic acid (m/z: 263.12891, Rt: 22.87), p-coumaric acid (m/z: 163.03954, Rt: 17.57).

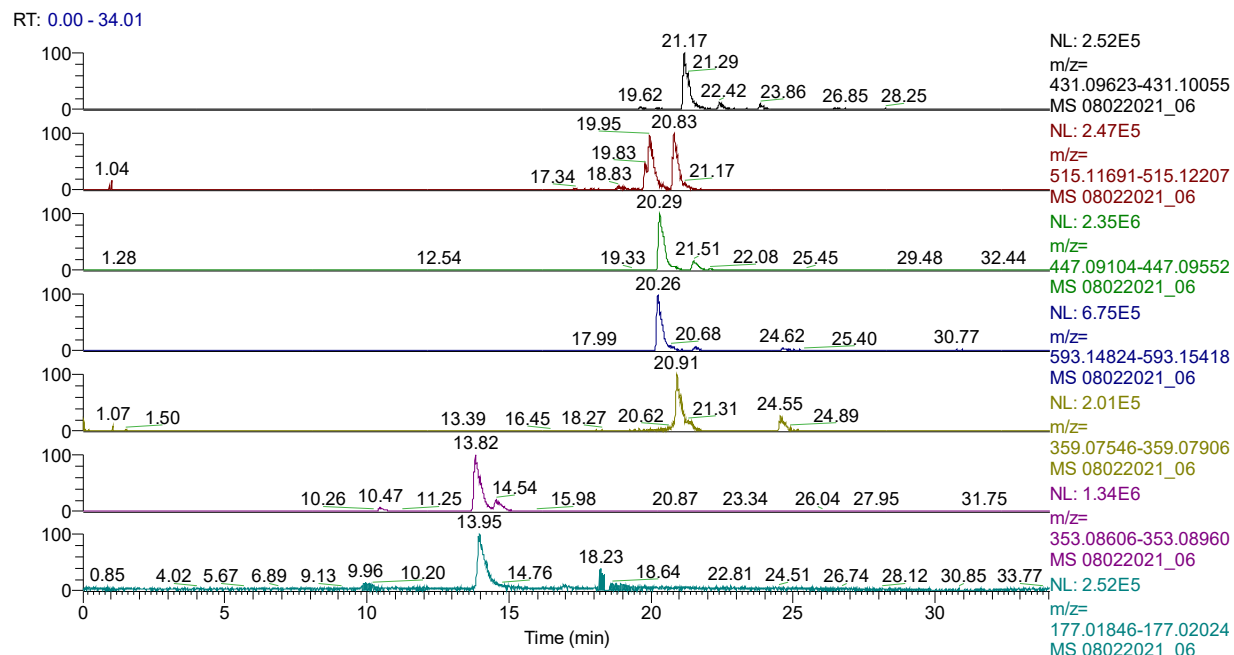

**Figure S7.** UHPLC-HRMS/MS chromatogram (b) of TE in which were identified (top to bottom): vitexin (m/z: 431.09839, Rt: 21.17), cynarine/1,5-dicaffeoylquinic acid (m/z: 515.11949, Rt: 19.95/20.83), cynaroside/luteolin-7-O-glucoside (m/z: 447.09328, Rt: 20.29), scolimoside (m/z: 593.15121, Rt: 20.26), rosmarinic acid (m/z: 359.07726, Rt: 20.91), neochlorogenic acid (m/z: 353.08783, Rt: 13.82), aesculetin (m/z: 177.01935, Rt: 13.95).

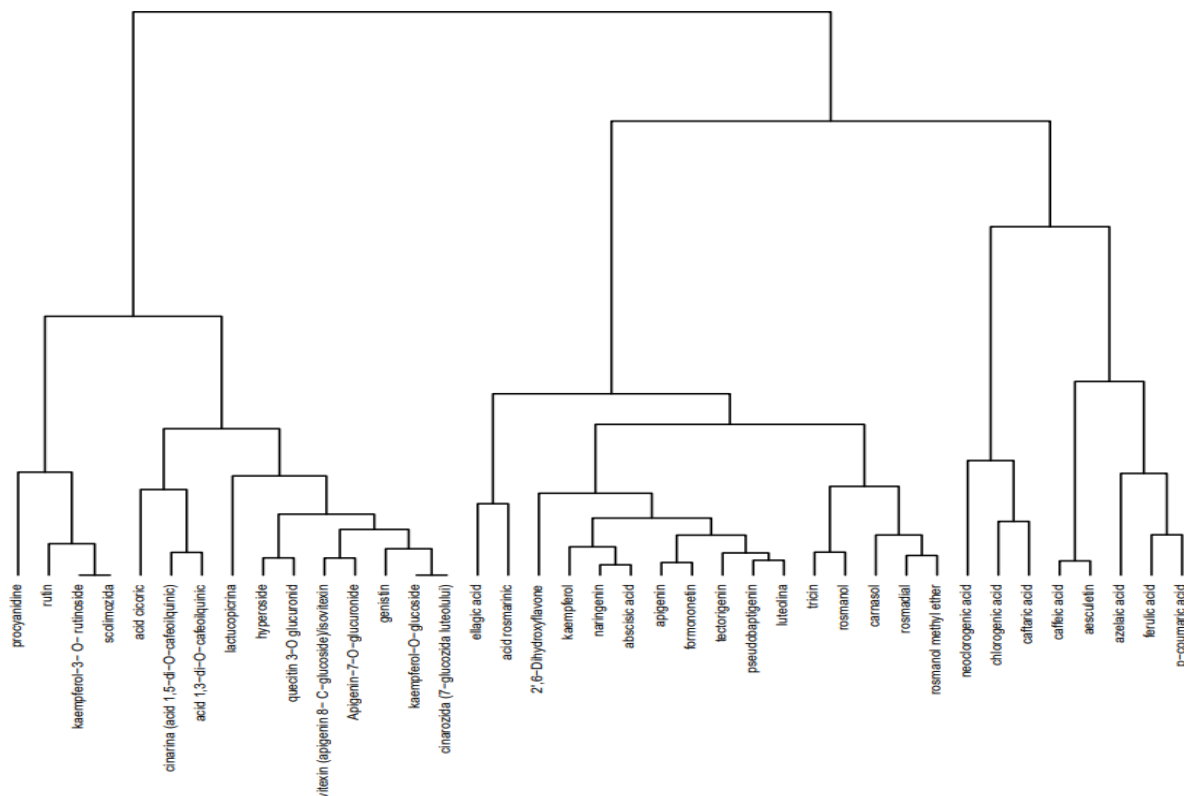

**Figure S8.** Dendrogram for TE compounds representative for the profile of polyphenolic derivatives obtained by the hierarchical grouping method Ward, HCA (Hierarchical Cluster Analysis).

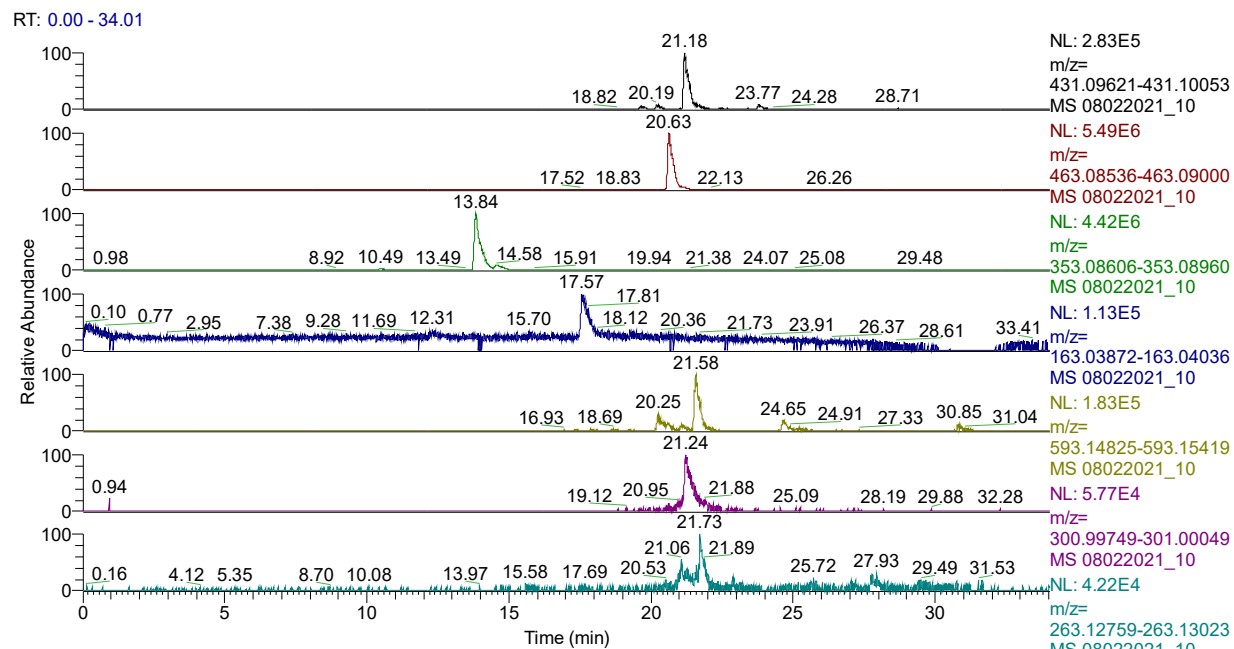

**Figure S9.** UHPLC-HRMS/MS chromatogram (a) for **CHE** in which were identified (top to bottom): genistin (m/z: 431.09837, Rt: 21.18), hyperoside/quercetin-3-galactoside (m/z: 463.08768, Rt: 20.63), neochlorogenic acid (m/z: 353.08783, Rt: 13.84), p-coumaric acid (m/z: 163.03954, Rt: 17.57), kaempferol-3-O-rutinoside (m/z: 593.15122, Rt: 20.25/21.58), ellagic acid (m/z: 300.99899, Rt: 21.24), abscisic acid (m/z: 263.12891, Rt: 21.73).

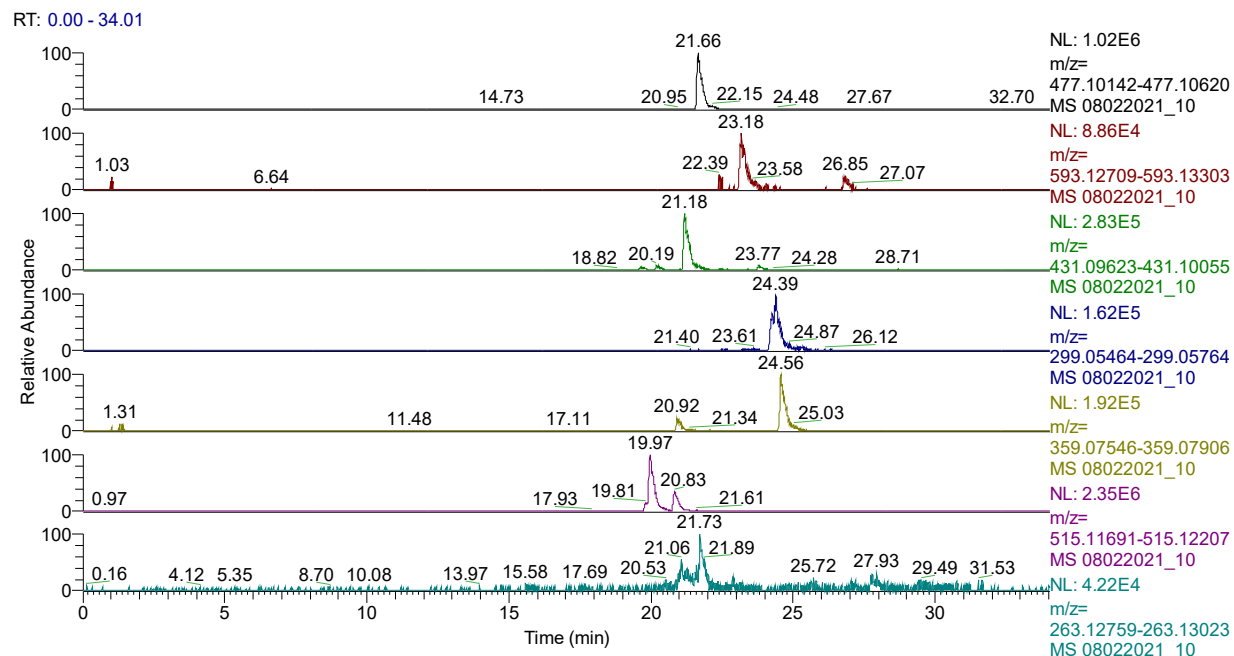

**Figure S10.** UHPLC-HRMS/MS chromatogram (b) for **CHE** in which were identified (top to bottom): isorhamnetin-3-O-glucoside (m/z: 477.10381, Rt: 21.66), procyanidin (m/z: 593.13006, Rt: 23.18), apigenin-7-glucoside (m/z: 431.09839, Rt: 21.18), chrysoeriol (m/z: 299.05614, Rt: 24.39), rosmarinic acid + isomer (m/z: 359.07726, Rt: 20.92/24.56), 1,5- and 1,3-dicaffeoylquinic acid (m/z: 515.11949, Rt: 19.97), abscisic acid (m/z: 263.12891, Rt: 21.73).

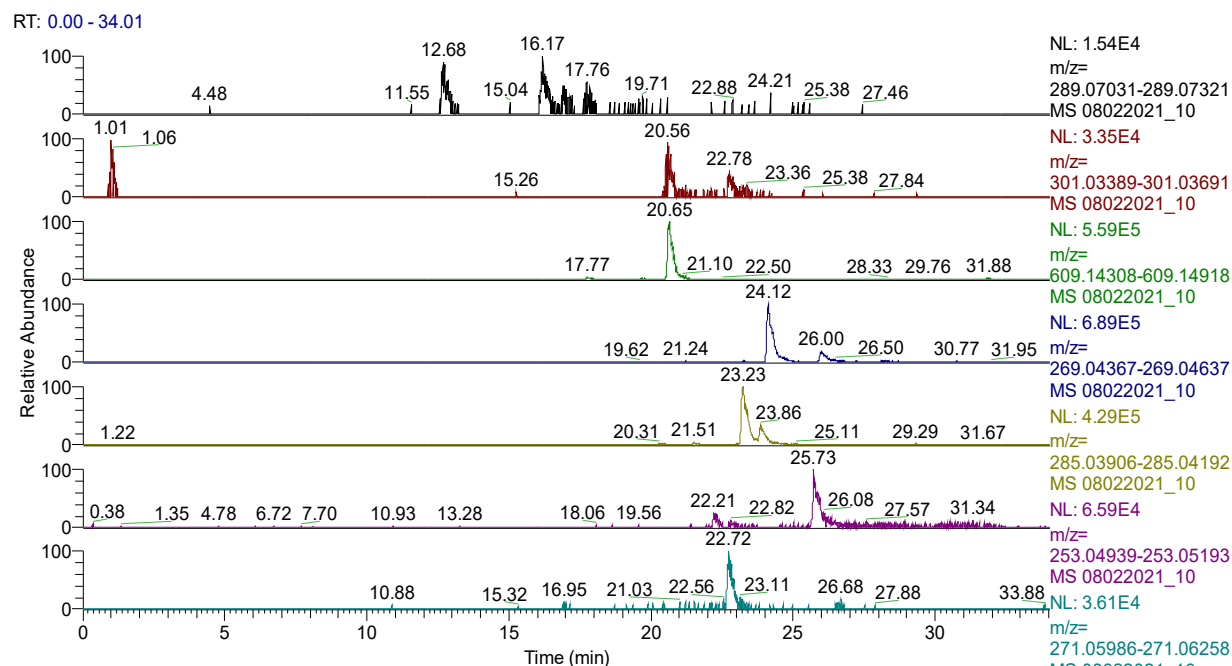

**Figure S11.** UHPLC-HRMS/MS chromatogram (c) for CHE in which were identified (top to bottom): catechin/epicatechin (m/z: 289.07176, Rt: 12.68, Rt: 16.17), quercetin (m/z: 301.03540, Rt: 20.56/22.78), rutin (m/z: 609.14613, Rt: 20.65), apigenin (m/z: 269.04502, Rt: 24.12), kaempferol (m/z: 285.04049, Rt: 23.23), chrysin (m/z: 253.05066, Rt: 25.73), naringenin (m/z: 271.06122, Rt: 22.72).

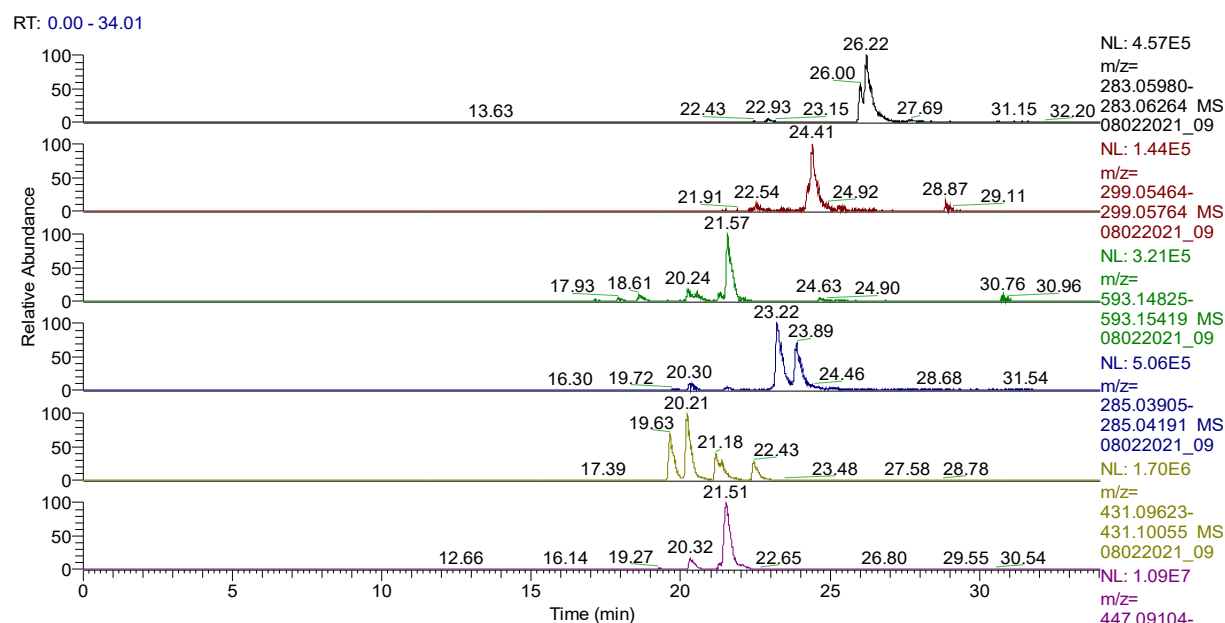

**Figure S12.** UHPLC-HRMS/MS chromatogram (a) for AE in which were identified (top to bottom): biochanin A (m/z: 283.06122, Rt: 26.22), pratensein (m/z: 299.05614, Rt: 24.41), apigenin-7-O-glucosylglucoside (m/z: 593.15121, Rt: 17.93/21.57), luteolin (m/z: 285.04048, Rt: 23.22/23.89), vitexin/isovitexin (m/z: 431.09839, Rt: 20.21), luteolin-O-glucoside/isomers (m/z: 447.09331, Rt: 20.32/21.51).

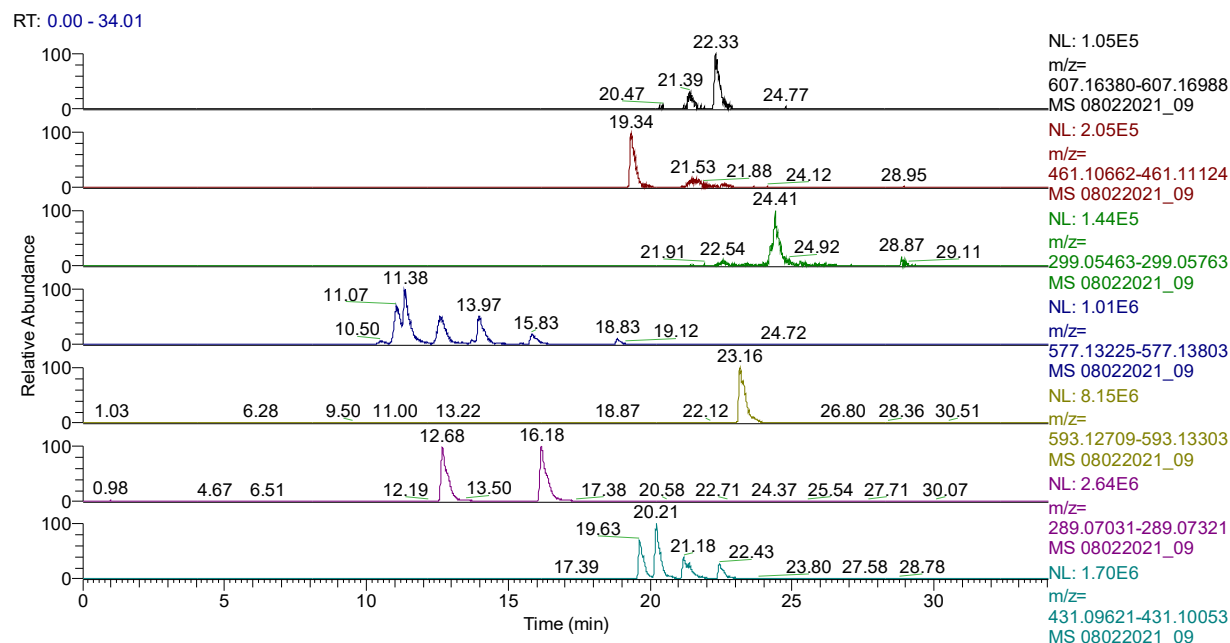

**Figure S13.** UHPLC-HRMS/MS chromatogram (b) for AE in which were identified (top to bottom): hispidulin-7-rutinoside/isomers (m/z: 607.16684, Rt: 21.39/22.33), hispidulin-O-glucoside/isomers (m/z: 461.10893, Rt: 19.34/21.53), hispidulin (m/z: 299.05613, Rt: 24.41), procyanidin B1/B2 (m/z: 577.13514, Rt: 11.38/13.97), procyanidin (m/z: 593.13006, Rt: 23.16), catechin/epicatechin (m/z: 289.07176, Rt: 12.68, Rt: 16.18), genistin/apigenin-7-glucoside/apigenin-8-C-glucoside/isomers (m/z: 431.09830, Rt: 19.63, Rt: 20.21, Rt: 21.18).

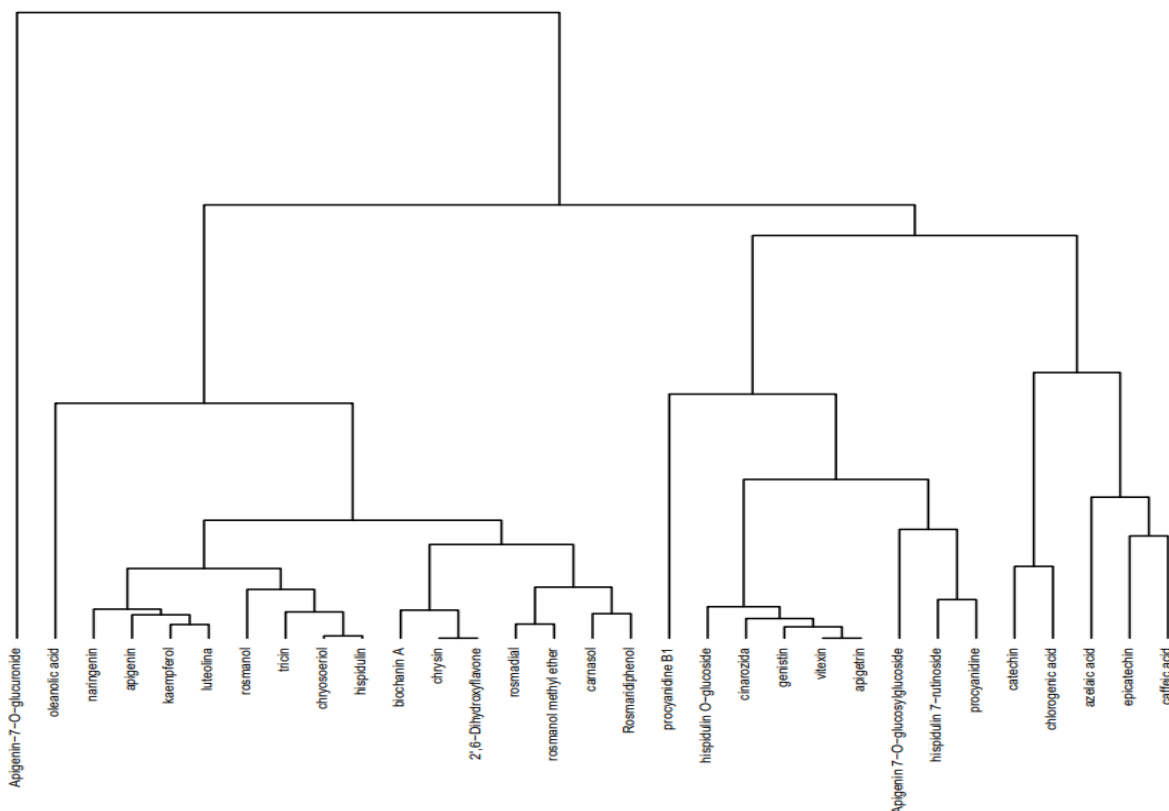

**Figure S14.** Dendrogram for AE compounds representative for the profile of polyphenolic derivatives obtained by the hierarchical grouping method Ward, HCA (Hierarchical Cluster Analysis).

**Table S1.** Antioxidant activity expressed as IC50 value.

| Vegetal extract | DPPH method (mg/mL) | ABTS method (mg/mL) | FRAP method (mg/mL) |
|-----------------|---------------------|---------------------|---------------------|
| CE              | 0.6596              | 0.1588              | 0.5413              |
| RE              | 0.0900              | 0.0297              | 0.0537              |
| TE              | 0.3121              | 0.0752              | 0.2745              |
| CHE             | 0.1954              | 0.0539              | 0.2012              |
| AE              | 0.0537              | 0.0147              | 0.0483              |

p>0.05 (significance level: 0.05).

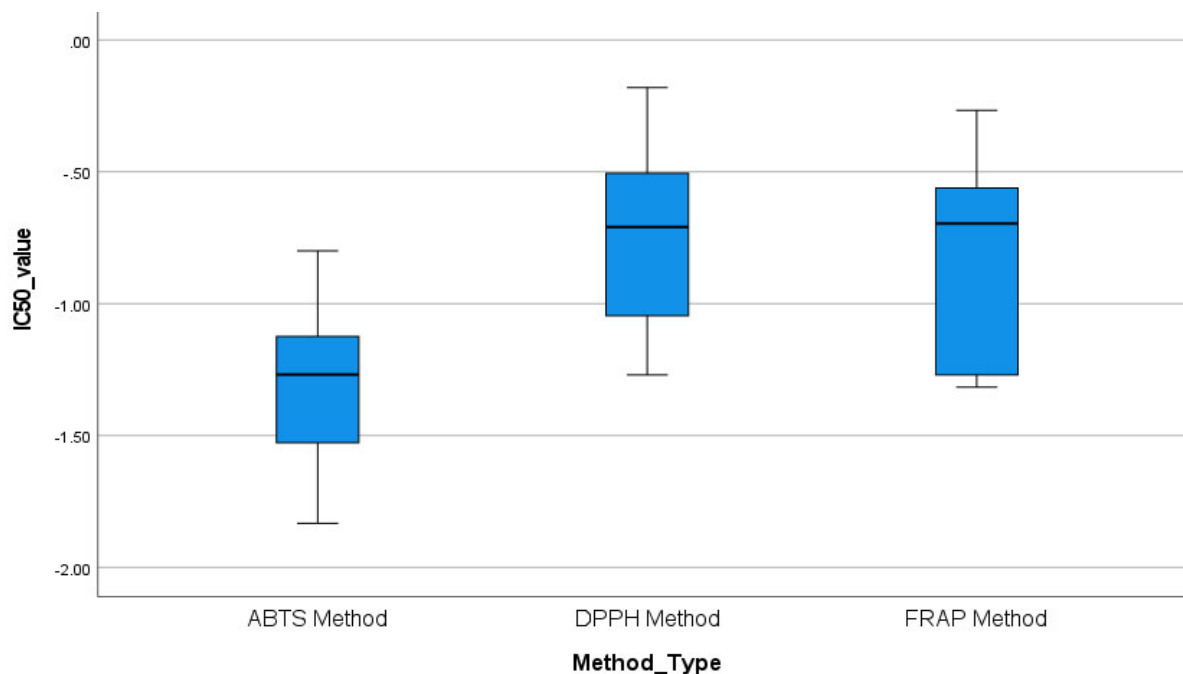

**Figure S15.** Boxplot Diagram – Distribution and spread of IC50 values between different methods.  
(\*assuming the normality of the data and the absence of outliers).

**Table S2.** Pearson's correlation coefficient between different antioxidant methodologies.

|      |                            | ABTS  | DPPH  | FRAP  |
|------|----------------------------|-------|-------|-------|
| ABTS | <b>Pearson Correlation</b> | 1     | .995* | .964* |
|      | Sig. (2-tailed)            |       | 0.000 | 0.008 |
|      | N                          | 5     | 5     | 5     |
| DPPH | <b>Pearson Correlation</b> | .995* | 1     | .982* |
|      | Sig. (2-tailed)            | 0.000 |       | 0.003 |
|      | N                          | 5     | 5     | 5     |
| FRAP | <b>Pearson Correlation</b> | .964* | .982* | 1     |
|      | Sig. (2-tailed)            | 0.008 | 0.003 |       |
|      | N                          | 5     | 5     | 5     |

\*. Correlation is significant at the 0.05 level (2-tailed).



**Table S3.** Multiple comparisons between groups for DPPH method (Games-Howell Post-Hoc Test - unequal variances).

| (I) Vegetal extract group | (J) Vegetal extract group | Mean Difference (I-J) | Std. Error | Sig.  | 95% Confidence Interval |             |
|---------------------------|---------------------------|-----------------------|------------|-------|-------------------------|-------------|
|                           |                           |                       |            |       | Lower Bound             | Upper Bound |
| DPPH <i>Cynara</i>        | DPPH <i>Rosmarinus</i>    | -.1900500*            | 0.0371136  | 0.004 | -0.313823               | -0.066277   |
|                           | DPPH <i>Agrimonia</i>     | -.3312400*            | 0.0481896  | 0.000 | -0.492484               | -0.169996   |
|                           | DPPH <i>Taraxacum</i>     | -.0386900*            | 0.0120439  | 0.045 | -0.076658               | -0.000722   |
|                           | DPPH <i>Cichorium</i>     | -.0910200*            | 0.0168290  | 0.002 | -0.145561               | -0.036479   |
| DPPH <i>Rosmarinus</i>    | DPPH <i>Cynara</i>        | .1900500*             | 0.0371136  | 0.004 | 0.066277                | 0.313823    |
|                           | DPPH <i>Agrimonia</i>     | -0.1411900            | 0.0603811  | 0.181 | -0.325059               | 0.042679    |
|                           | DPPH <i>Taraxacum</i>     | .1513600*             | 0.0383236  | 0.017 | 0.026522                | 0.276198    |
|                           | DPPH <i>Cichorium</i>     | 0.0990300             | 0.0400857  | 0.161 | -0.028249               | 0.226309    |
| DPPH <i>Agrimonia</i>     | DPPH <i>Cynara</i>        | .3312400*             | 0.0481896  | 0.000 | 0.169996                | 0.492484    |
|                           | DPPH <i>Rosmarinus</i>    | 0.1411900             | 0.0603811  | 0.181 | -0.042679               | 0.325059    |
|                           | DPPH <i>Taraxacum</i>     | .2925500*             | 0.0491276  | 0.001 | 0.130629                | 0.454471    |
|                           | DPPH <i>Cichorium</i>     | .2402200*             | 0.0505141  | 0.004 | 0.076818                | 0.403622    |
| DPPH <i>Taraxacum</i>     | DPPH <i>Cynara</i>        | .0386900*             | 0.0120439  | 0.045 | 0.000722                | 0.076658    |
|                           | DPPH <i>Rosmarinus</i>    | -.1513600*            | 0.0383236  | 0.017 | -0.276198               | -0.026522   |
|                           | DPPH <i>Agrimonia</i>     | -.2925500*            | 0.0491276  | 0.001 | -0.454471               | -0.130629   |
|                           | DPPH <i>Cichorium</i>     | -0.0523300            | 0.0193519  | 0.098 | -0.111687               | 0.007027    |
| DPPH <i>Cichorium</i>     | DPPH <i>Cynara</i>        | .0910200*             | 0.0168290  | 0.002 | 0.036479                | 0.145561    |
|                           | DPPH <i>Rosmarinus</i>    | -0.0990300            | 0.0400857  | 0.161 | -0.226309               | 0.028249    |
|                           | DPPH <i>Agrimonia</i>     | -.2402200*            | 0.0505141  | 0.004 | -0.403622               | -0.076818   |
|                           | DPPH <i>Taraxacum</i>     | 0.0523300             | 0.0193519  | 0.098 | -0.007027               | 0.111687    |

\*, The mean difference is significant at the 0.05 level.

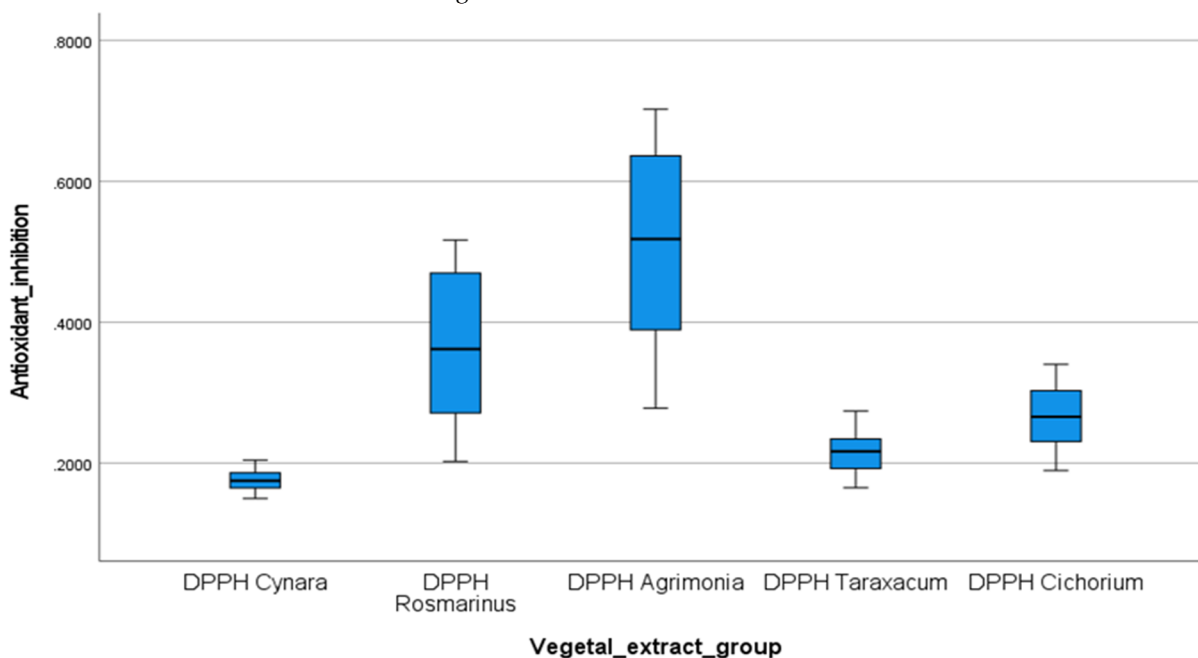

**Figure S16.** Boxplot Diagram – Distribution and spread of DPPH data set for every vegetal extract group.  
(\*mandatory assumptions were tested in order to apply statistical analysis).

**Table S41.** Multiple comparisons between groups for ABTS method (Games-Howell Post-Hoc Test - unequal variances).

| (I) Vegetal extract group | (J) Vegetal extract group | Mean Difference (I-J) | Std. Error | Sig.  | 95% Confidence Interval |             |
|---------------------------|---------------------------|-----------------------|------------|-------|-------------------------|-------------|
|                           |                           |                       |            |       | Lower Bound             | Upper Bound |
| ABTS <i>Cynara</i>        | ABTS <i>Rosmarinus</i>    | -0.0169300            | 0.0263381  | 0.966 | -0.096574               | 0.062714    |
|                           | ABTS <i>Agrimonia</i>     | -.1376100*            | 0.0373452  | 0.017 | -0.253682               | -0.021538   |
|                           | ABTS <i>Taraxacum</i>     | .0689800*             | 0.0201256  | 0.032 | 0.005072                | 0.132888    |
|                           | ABTS <i>Cichorium</i>     | 0.0334400             | 0.0212481  | 0.535 | -0.032579               | 0.099459    |
| ABTS <i>Rosmarinus</i>    | ABTS <i>Cynara</i>        | 0.0169300             | 0.0263381  | 0.966 | -0.062714               | 0.096574    |
|                           | ABTS <i>Agrimonia</i>     | -.1206800*            | 0.0375135  | 0.041 | -0.237107               | -0.004253   |
|                           | ABTS <i>Taraxacum</i>     | .0859100*             | 0.0204362  | 0.009 | 0.020925                | 0.150895    |
|                           | ABTS <i>Cichorium</i>     | 0.0503700             | 0.0215424  | 0.190 | -0.016661               | 0.117401    |
| ABTS <i>Agrimonia</i>     | ABTS <i>Cynara</i>        | .1376100*             | 0.0373452  | 0.017 | 0.021538                | 0.253682    |
|                           | ABTS <i>Rosmarinus</i>    | .1206800*             | 0.0375135  | 0.041 | 0.004253                | 0.237107    |
|                           | ABTS <i>Taraxacum</i>     | .2065900*             | 0.0334456  | 0.001 | 0.096722                | 0.316458    |
|                           | ABTS <i>Cichorium</i>     | .1710500*             | 0.0341328  | 0.003 | 0.060439                | 0.281661    |
| ABTS <i>Taraxacum</i>     | ABTS <i>Cynara</i>        | -.0689800*            | 0.0201256  | 0.032 | -0.132888               | -0.005072   |
|                           | ABTS <i>Rosmarinus</i>    | -.0859100*            | 0.0204362  | 0.009 | -0.150895               | -0.020925   |
|                           | ABTS <i>Agrimonia</i>     | -.2065900*            | 0.0334456  | 0.001 | -0.316458               | -0.096722   |
|                           | ABTS <i>Cichorium</i>     | -0.0355400            | 0.0132448  | 0.099 | -0.075884               | 0.004804    |
| ABTS <i>Cichorium</i>     | ABTS <i>Cynara</i>        | -0.0334400            | 0.0212481  | 0.535 | -0.099459               | 0.032579    |
|                           | ABTS <i>Rosmarinus</i>    | -0.0503700            | 0.0215424  | 0.190 | -0.117401               | 0.016661    |
|                           | ABTS <i>Agrimonia</i>     | -.1710500*            | 0.0341328  | 0.003 | -0.281661               | -0.060439   |
|                           | ABTS <i>Taraxacum</i>     | 0.0355400             | 0.0132448  | 0.099 | -0.004804               | 0.075884    |

\*, The mean difference is significant at the 0.05 level.

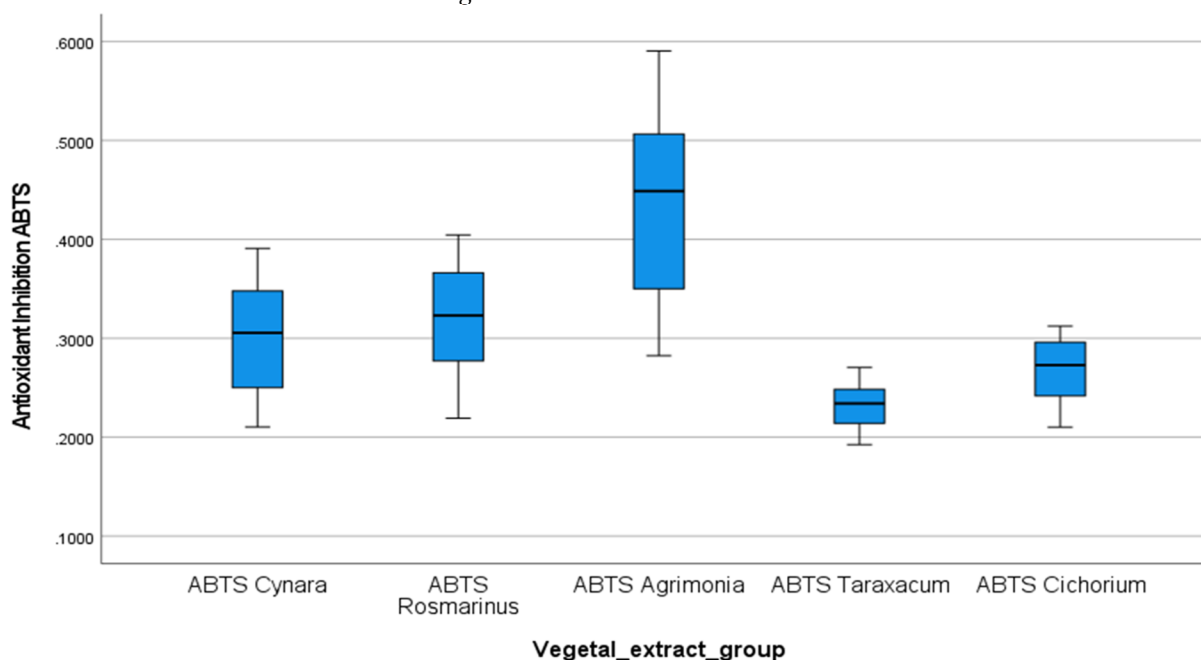

**Figure S17.** Boxplot Diagram – Distribution and spread of ABTS data set for every vegetal extract group (\*were applied tests of normality, homogeneity of variances, linearity tests and absence of outliers).

**Table S5.** Multiple comparisons between groups for FRAP method (Tukey HSD Post-Hoc Test - equal variances).

| (I) Vegetal extract group | (J) Vegetal extract group | Mean Difference (I-J) | Std. Error | Sig.  | 95% Confidence Interval |             |
|---------------------------|---------------------------|-----------------------|------------|-------|-------------------------|-------------|
|                           |                           |                       |            |       | Lower Bound             | Upper Bound |
| FRAP <i>Cynara</i>        | FRAP <i>Rosmarinus</i>    | -.70163*              | 0.11469    | 0.000 | -1.0275                 | -0.3758     |
|                           | FRAP <i>Agrimonia</i>     | -.70736*              | 0.11469    | 0.000 | -1.0332                 | -0.3815     |
|                           | FRAP <i>Taraxacum</i>     | -0.22463              | 0.11469    | 0.303 | -0.5505                 | 0.1012      |
|                           | FRAP <i>Cichorium</i>     | -.33381*              | 0.11469    | 0.042 | -0.6597                 | -0.0079     |
| FRAP <i>Rosmarinus</i>    | FRAP <i>Cynara</i>        | .70163*               | 0.11469    | 0.000 | 0.3758                  | 1.0275      |
|                           | FRAP <i>Agrimonia</i>     | -0.00573              | 0.11469    | 1.000 | -0.3316                 | 0.3201      |
|                           | FRAP <i>Taraxacum</i>     | .47700*               | 0.11469    | 0.001 | 0.1511                  | 0.8029      |
|                           | FRAP <i>Cichorium</i>     | .36782*               | 0.11469    | 0.020 | 0.0419                  | 0.6937      |
| FRAP <i>Agrimonia</i>     | FRAP <i>Cynara</i>        | .70736*               | 0.11469    | 0.000 | 0.3815                  | 1.0332      |
|                           | FRAP <i>Rosmarinus</i>    | 0.00573               | 0.11469    | 1.000 | -0.3201                 | 0.3316      |
|                           | FRAP <i>Taraxacum</i>     | .48273*               | 0.11469    | 0.001 | 0.1569                  | 0.8086      |
|                           | FRAP <i>Cichorium</i>     | .37355*               | 0.11469    | 0.017 | 0.0477                  | 0.6994      |
| FRAP <i>Taraxacum</i>     | FRAP <i>Cynara</i>        | 0.22463               | 0.11469    | 0.303 | -0.1012                 | 0.5505      |
|                           | FRAP <i>Rosmarinus</i>    | -.47700*              | 0.11469    | 0.001 | -0.8029                 | -0.1511     |
|                           | FRAP <i>Agrimonia</i>     | -.48273*              | 0.11469    | 0.001 | -0.8086                 | -0.1569     |
|                           | FRAP <i>Cichorium</i>     | -0.10918              | 0.11469    | 0.875 | -0.4351                 | 0.2167      |
| FRAP <i>Cichorium</i>     | FRAP <i>Cynara</i>        | .33381*               | 0.11469    | 0.042 | 0.0079                  | 0.6597      |
|                           | FRAP <i>Rosmarinus</i>    | -.36782*              | 0.11469    | 0.020 | -0.6937                 | -0.0419     |
|                           | FRAP <i>Agrimonia</i>     | -.37355*              | 0.11469    | 0.017 | -0.6994                 | -0.0477     |
|                           | FRAP <i>Taraxacum</i>     | 0.10918               | 0.11469    | 0.875 | -0.2167                 | 0.4351      |

\*. The mean difference is significant at the 0.05 level.

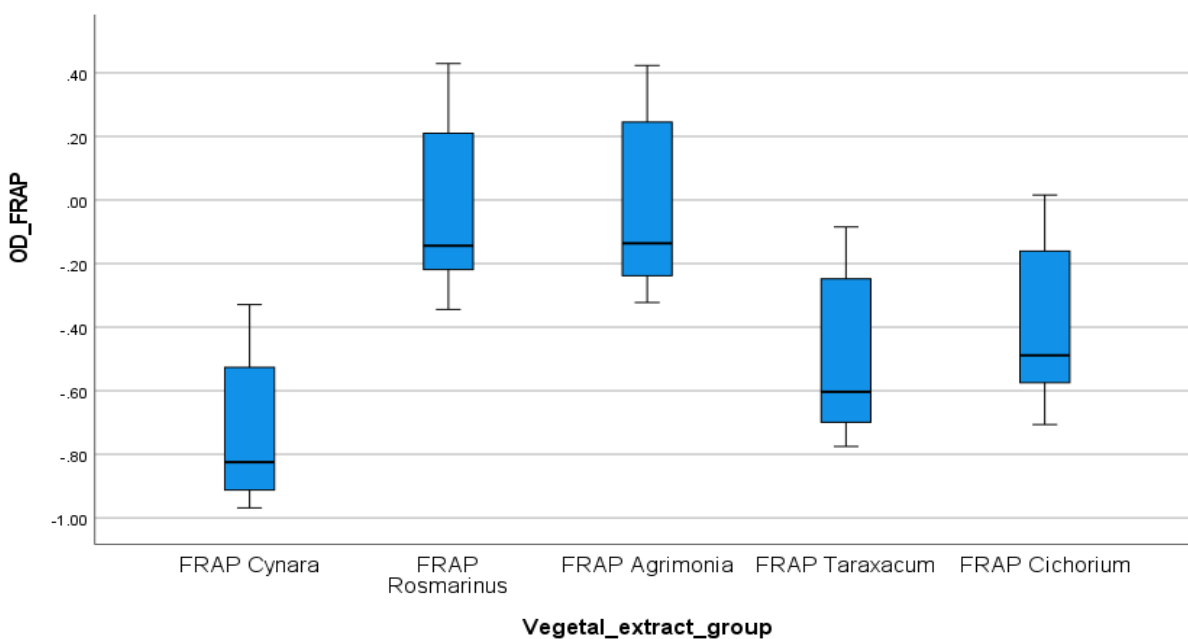

**Figure S18.** Boxplot Diagram – Distribution and spread of FRAP data set for every vegetal extract group. (\*normally distributed data set).

**Table S6.** Pearson's correlation coefficient between total phenolic compounds (TP) and total antioxidant activity.

|          |                     | TP_value | ABTS IC50 | DPPH IC50 | FRAP EC50 |
|----------|---------------------|----------|-----------|-----------|-----------|
| TP value | Pearson Correlation | 1        | -.930*    | -.956*    | -.979*    |
|          | Sig. (2-tailed)     |          | 0.022     | 0.011     | 0.004     |
|          | N                   | 5        | 5         | 5         | 5         |

\*, Correlation is significant at the 0.05 level (2-tailed).

**Table S7.** Pearson's correlation coefficient between total phenolic acids (TPA) and total antioxidant activity.

|           |                     | TPA_value | ABTS IC50 | DPPH IC50 | FRAP EC50 |
|-----------|---------------------|-----------|-----------|-----------|-----------|
| TPA value | Pearson Correlation | 1         | -.980*    | -.973*    | -.965*    |
|           | Sig. (2-tailed)     |           | 0.003     | 0.005     | 0.008     |
|           | N                   | 5         | 5         | 5         | 5         |

\*, Correlation is significant at the 0.05 level (2-tailed).

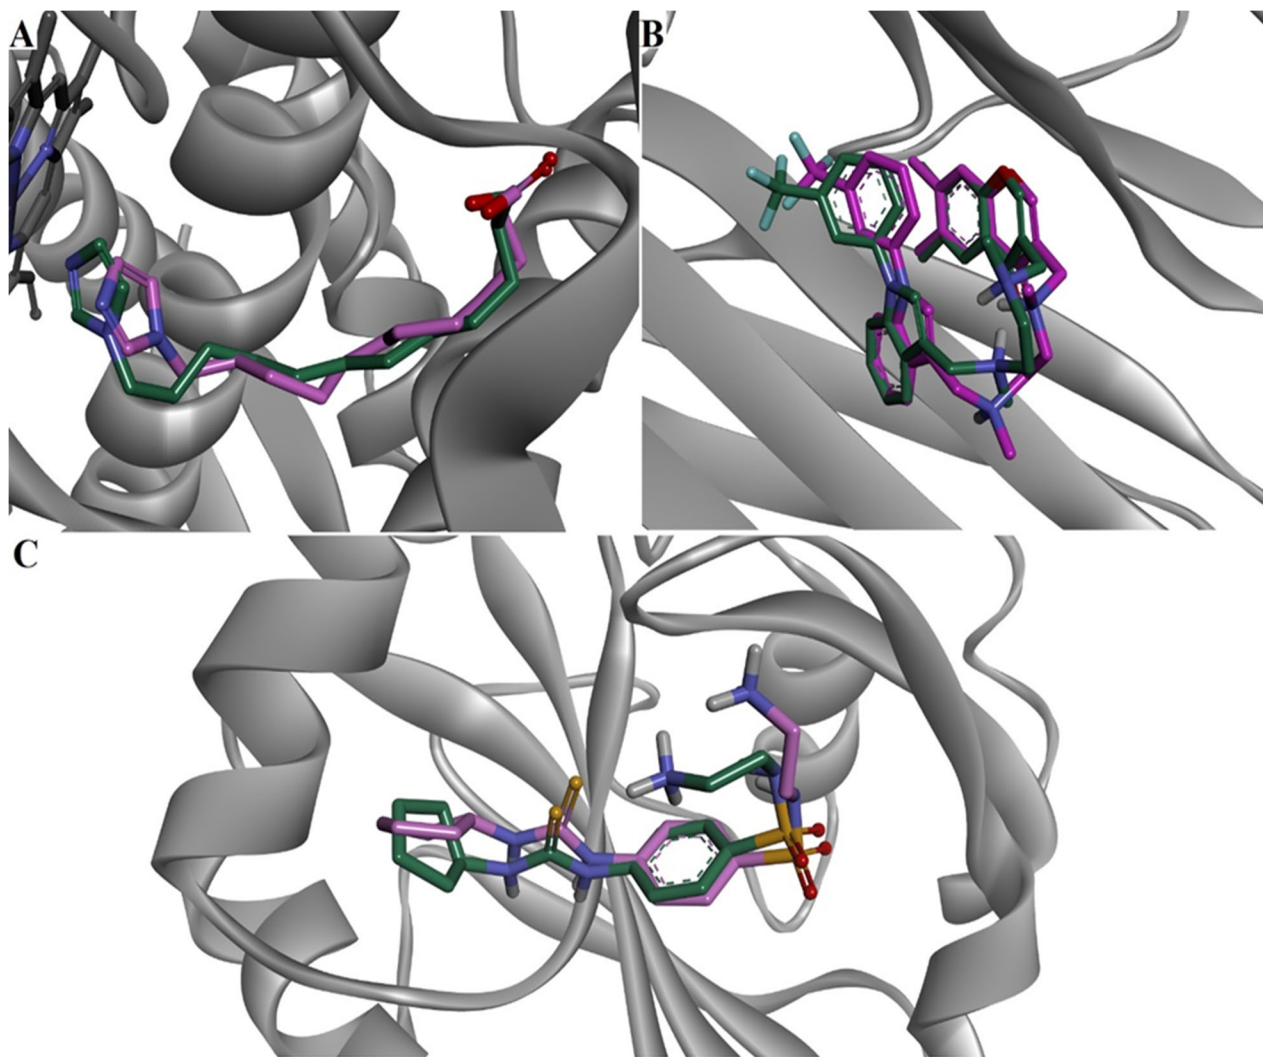

**Figure S19.** Superposition of docking poses (pink) on initial/crystal conformations (green). **A** – CYP2E1 inhibitor omega-imidazolyl-dodecanoic acid; **B** – TNF- $\alpha$  inhibitor SPD304; **C** – GPx4 allosteric activator 1d4.

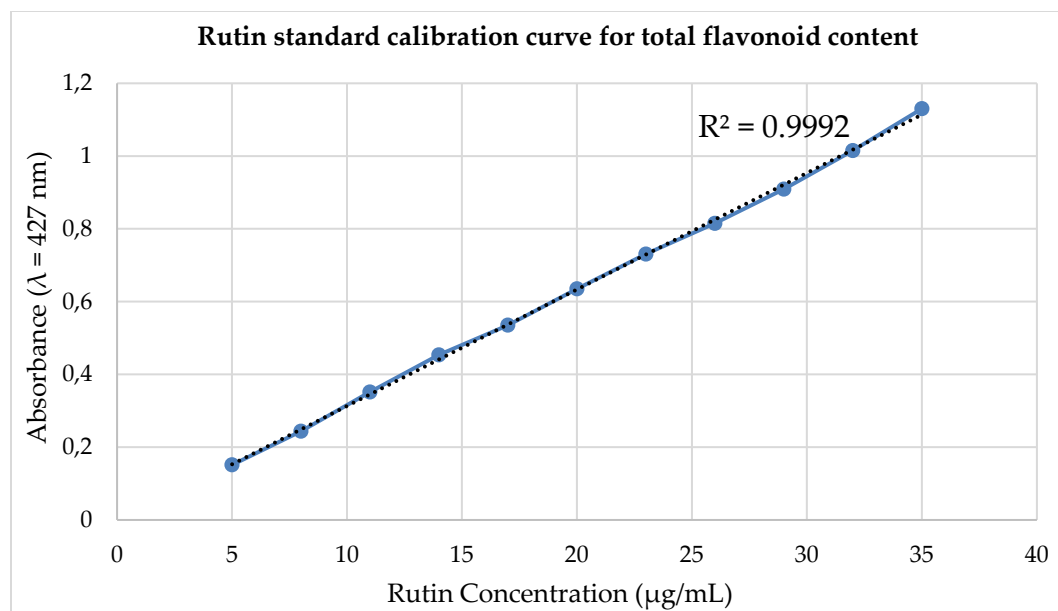

**Figure S20.** Standard curve of rutin (TF).

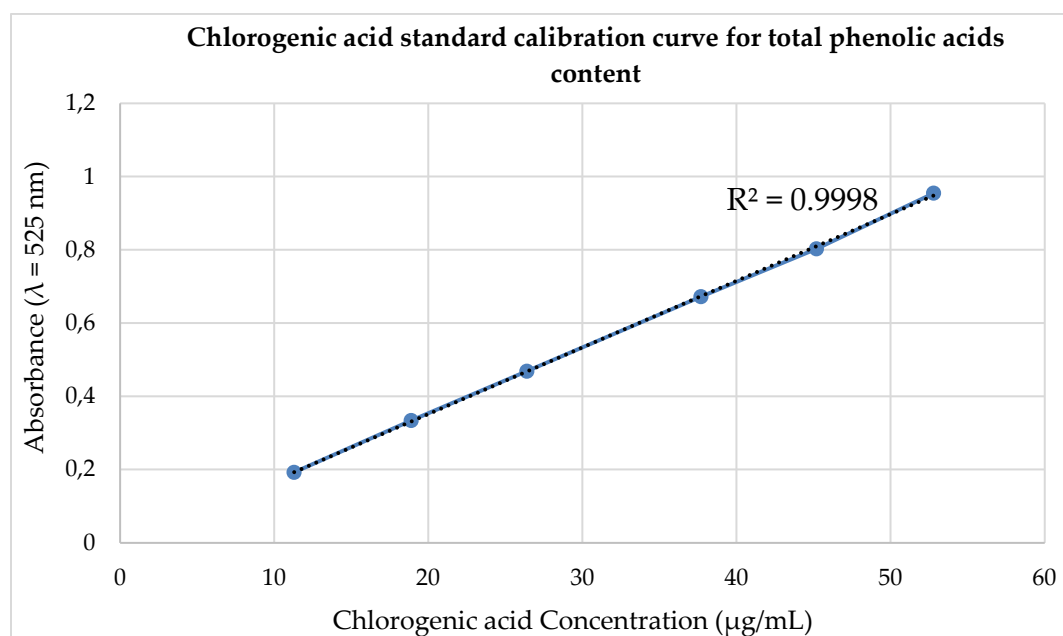

**Figure S21.** Standard curve of chlorogenic acid (TPA).

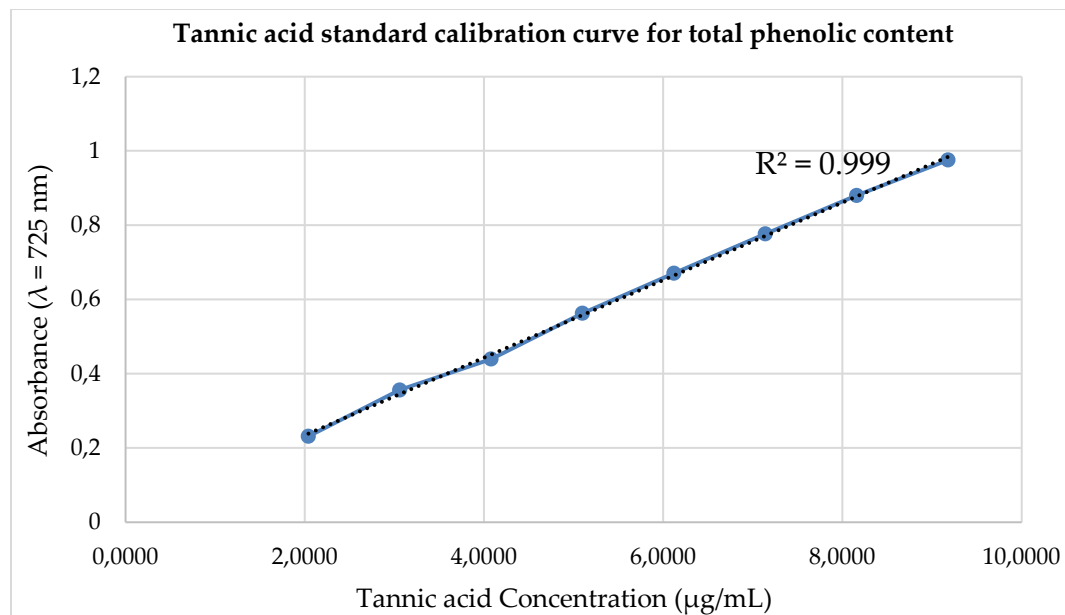

**Figure S22.** Standard curve for tannic acid (TP).

### Optimization of UHPLC and MS conditions

The mobile phase and the flow were investigated for optimal separation of the analytes. According to previous studies, methanol was chosen as the organic part of the mobile phase (La Barbera *et al.*, 2017). A small part of the addition of an organic acid prevents the adaptation to the C18 column of the hydroxyl phenolic moiety (La Barbera *et al.*, 2017).

Polyphenolic compounds have generally shown better mass spectrometric responses to negative ionization (La Barbera *et al.*, 2017; Ciucure and Geană, 2019). Therefore, 0.05% and 0.1% aqueous solutions of formic acid were tested as mobile phase A with a flow rate of 0.3 mL/min. Based on the results, 0.05% formic acid was preferred as mobile phase A. The elution gradient was progressively slowed down in order to increase the number of chromatographic peak data points. The ESI ionization parameters have been optimized to obtain high sensitivity for most compounds. The optimal conditions were presented in the **Materials and methods** section.

Operating in vDIA mode, the instrument alternates between MS and MS2 scans, and a sufficient number of data points per chromatographic peak is required to ensure a large number of detected peaks. In full scan MS, the resolution was set to 70,000 (FWHM at  $m/z$  200), the AGC target was set to  $3 \times 10^6$  and the injection time was set to 200 ms. For the MS-MS scan, the resolution was set to 35,000, the AGC target to  $1 \times 10^6$  and the injection time to 100 ms. The mass error for all identified compounds was less than 2 ppm.

For the presumptive identification of the compounds without available reference standards, structures were assumed based on the exact mass of deprotonated precursors and ion fragments. The elemental chemical composition for each peak was assigned with a mass error of 2 ppm. The fragmentation pattern was presumed by comparison with NORMAN MassBank (<https://massbank.eu/MassBank/>), mzCloud Database (<https://www.mzcloud.org/>), and PubChem (<https://pubchem.ncbi.nlm.nih.gov/>). Also, ACDLabs MS Fragmenter 2019.2.1 software was used to generate a fragmentation pattern.

### Validation of the method for quantifying polyphenols by the UHPLC-HRMS/MS technique

Analytical performances of the target HRMS analysis of polyphenolic compounds from samples were expressed in terms of linearity, correlation coefficients ( $R^2$ ), limit of detection (LOD), and limit of quantification (LOQ). The calibration was performed in the concentration range of 0.025 - 2.5 μg/mL for

each of the phenolic compounds by serial dilution with a mixture of water:methanol (90:10) of the stock standard mixture of 1 mg/L. The limit of detection (LOD) and the limit of quantification (LOQ) for each target compound were determined as 3.3 times and 10 times, respectively, the standard deviation of the  $y$ -intercept, divided by the slope of the calibration curve (ICH Harmonised Tripartite Guideline - Validation of Analytical Procedures: Text and Methodology Q2 (R1)).

The method accuracy was assessed by repeatability and reproducibility evaluation and expressed as relative standard deviations (RSD). The acceptance criterion was an RSD value below 5.0%. Repeatability was assessed by analyzing six samples from the above samples, and reproducibility was examined for three consecutive days with six samples per day. The results were expressed as  $\mu\text{g/g}$  of lyophilized plant extract.

**Table S8.** Validation parameters of the LC-HRMS analytical method.

| Compounds/Validation parameters | Calibration equations   | $R^2$ | LOD $\mu\text{g/g DW}$ | LOQ $\mu\text{g/g DW}$ | Precision (RSD, %) |           | Repeatability (RSD, %) |
|---------------------------------|-------------------------|-------|------------------------|------------------------|--------------------|-----------|------------------------|
|                                 |                         |       |                        |                        | intra-day          | inter-day |                        |
| catechin                        | $y=824313.8x+203017.7$  | 0.991 | 0.40                   | 1.30                   | 3.15               | 2.85      | 3.21                   |
| epicatechin                     | $y=230287.5x-168641.6$  | 0.992 | 0.85                   | 2.83                   | 1.41               | 2.62      | 2.16                   |
| caffeic acid                    | $y=781534.3x+393060$    | 0.990 | 1.84                   | 6.13                   | 2.36               | 4.10      | 3.82                   |
| myricetin                       | $y=32881x-738887$       | 0.994 | 1.21                   | 4.03                   | 0.89               | 1.36      | 2.07                   |
| p-coumaric acid                 | $y=82377489.4x+486112$  | 0.995 | 0.62                   | 2.06                   | 1.23               | 3.04      | 2.95                   |
| syringic acid                   | $y=72565.8x-82305$      | 0.993 | 0.35                   | 1.16                   | 2.81               | 4.01      | 3.87                   |
| genistin                        | $y=18732x-110805$       | 0.998 | 1.65                   | 5.50                   | 1.65               | 1.85      | 2.04                   |
| chlorogenic acid                | $y=174329.1x+19222.5$   | 0.998 | 0.71                   | 2.30                   | 3.45               | 3.89      | 4.01                   |
| ferulic acid                    | $y=121050x-2321515$     | 0.999 | 0.15                   | 0.50                   | 1.25               | 1.87      | 2.56                   |
| hyperoside                      | $y=117573.7x+1512847.8$ | 0.998 | 0.47                   | 1.56                   | 3.21               | 4.32      | 3.58                   |
| isorhamnetin                    | $y=3022x+156072$        | 0.999 | 1.02                   | 3.40                   | 2.47               | 2.67      | 2.12                   |
| rutin                           | $y=102426.9x+77215.4$   | 0.991 | 0.65                   | 2.16                   | 2.43               | 3.16      | 3.04                   |
| gallic acid                     | $y=449675.5x-332050.7$  | 0.994 | 0.31                   | 1.03                   | 1.26               | 2.08      | 2.74                   |
| ellagic acid                    | $y=10520x-1437986$      | 0.990 | 1.03                   | 3.04                   | 1.11               | 1.15      | 1.27                   |
| formononetin                    | $y=2628478x+16100393$   | 0.999 | 0.42                   | 1.40                   | 1.48               | 1.58      | 2.23                   |
| ononin                          | $y=211703.5x+1291087$   | 0.992 | 10.50                  | 35.10                  | 3.04               | 4.11      | 3.98                   |
| pinocembrin                     | $y=1301012x-4130476$    | 0.999 | 0.10                   | 0.30                   | 1.95               | 2.28      | 2.65                   |
| apigenin                        | $y=897709x-73484551$    | 0.998 | 0.22                   | 0.73                   | 1.65               | 2.90      | 3.07                   |
| galangin                        | $y=866716.1x+21534478$  | 0.998 | 0.15                   | 0.47                   | 1.04               | 1.87      | 1.95                   |
| pinostrobin                     | $y=695357x-22084171$    | 0.999 | 0.15                   | 0.50                   | 2.76               | 3.16      | 3.82                   |
| kaempferol                      | $y=324023.5x+35109689$  | 0.991 | 0.30                   | 1.00                   | 3.07               | 3.65      | 3.18                   |
| hesperetin                      | $y=1635.3x-120620$      | 0.990 | 0.95                   | 3.16                   | 2.89               | 3.07      | 3.14                   |
| genistein                       | $y=1598102x+5526494$    | 0.999 | 0.30                   | 1.00                   | 1.58               | 2.49      | 2.61                   |
| naringenin                      | $y=818977.8x+1767512$   | 0.994 | 0.14                   | 0.46                   | 2.80               | 3.74      | 3.06                   |
| naringin                        | $y=73403.1x+53366.8$    | 0.998 | 6.90                   | 23.00                  | 1.08               | 2.16      | 3.85                   |
| quercetin                       | $y=125092.1x+747968$    | 0.999 | 1.60                   | 5.33                   | 1.11               | 2.65      | 1.85                   |
| glycitein                       | $y=259340.7x+6212357$   | 0.999 | 0.55                   | 1.83                   | 2.08               | 3.18      | 2.74                   |
| daidzin                         | $y=1017.2x-74781$       | 0.997 | 1.08                   | 3.60                   | 2.65               | 3.74      | 4.08                   |
| daidzein                        | $y=2071x+3009.8$        | 0.999 | 1.15                   | 3.83                   | 1.43               | 2.65      | 2.14                   |
| chrysin                         | $y=430529x-185238$      | 0.995 | 0.21                   | 0.70                   | 1.08               | 2.14      | 2.68                   |
| abscisic acid                   | $y=222271x-396923$      | 0.996 | 0.15                   | 0.37                   | 1.66               | 1.89      | 1.54                   |

The correlation coefficient  $R^2$  for all standards was greater than 0.99, showing good linearity. The RSD standard deviation values of the target compounds were less than 5.0%, which proved good accuracy. The values of LOD and LOQ detection and quantification limits were maintained in the range of 0.10 - 10.50  $\mu\text{g/g}$  DW (dry weight) and 0.30 – 35.10  $\mu\text{g/g}$  DW, respectively (Table S1).

**Table S9.** Monitored compounds by full scan - HRMS analysis and MS-MS analysis based on analytical standards.

| Compound                         | Rt (min) | Chemical formula                                | Exact mass | Error (ppm) | [M-H] <sup>-</sup> Ion (m/z) | MS2 Fragment ions (m/z)                                                         |
|----------------------------------|----------|-------------------------------------------------|------------|-------------|------------------------------|---------------------------------------------------------------------------------|
| Flavonoids                       |          |                                                 |            |             |                              |                                                                                 |
| catechin                         | 7.80     | C <sub>15</sub> H <sub>14</sub> O <sub>6</sub>  | 290.07904  | 1.47        | 289.07176                    | 245.08192;<br>203.07088;<br>151.03908;<br>125.02320;<br>109.02821               |
| epicatechin                      | 10.19    | C <sub>15</sub> H <sub>14</sub> O <sub>6</sub>  | 290.07904  | 1.25        | 289.07176                    | 245.08192;<br>203.07088;<br>151.03908;<br>109.02821                             |
| quercetin                        | 16.59    | C <sub>15</sub> H <sub>10</sub> O <sub>7</sub>  | 302.04265  | 0.86        | 301.03540                    | 245.04601;<br>178.99809;<br>273.04059;<br>121.02814                             |
| rutin (quercetin-3-O-rutinoside) | 14.20    | C <sub>27</sub> H <sub>30</sub> O <sub>16</sub> | 610.15338  | 0.50        | 609.14613                    | 300.02777;<br>271.02505;<br>255.02995;<br>243.02980;<br>165.01841;<br>151.00258 |
| apigenin                         | 17.54    | C <sub>15</sub> H <sub>10</sub> O <sub>5</sub>  | 270.05282  | 1.18        | 269.04502                    | 227.03389;<br>181.06430;<br>151.00194;<br>149.00226;<br>117.03271               |
| kaempferol                       | 17.06    | C <sub>15</sub> H <sub>10</sub> O <sub>6</sub>  | 286.04774  | 0.57        | 285.04049                    | 255.02977;<br>201.01866;<br>151.00262;<br>107.01250;<br>92.92660                |
| isorhamnetin                     | 13.20    | C <sub>16</sub> H <sub>12</sub> O <sub>7</sub>  | 316.05830  | 1.35        | 315.05105                    | 300.02710;<br>227.03508;<br>163.00369;<br>151.00264;<br>107.01190               |
| naringenin                       | 19.69    | C <sub>15</sub> H <sub>12</sub> O <sub>5</sub>  | 272.06847  | 0.50        | 271.06122                    | 253.05055;<br>151.00269;                                                        |



|                                             |       |                                                 |           |      |           |                                                                                 |
|---------------------------------------------|-------|-------------------------------------------------|-----------|------|-----------|---------------------------------------------------------------------------------|
|                                             |       |                                                 |           |      |           | 119.04903;<br>107.01258                                                         |
| naringin                                    | 14.11 | C <sub>27</sub> H <sub>32</sub> O <sub>14</sub> | 580.17920 | 2.02 | 579.17185 | 356.99371;<br>255.02995;<br>119.04884                                           |
| hesperetin                                  | 16.83 | C <sub>16</sub> H <sub>14</sub> O <sub>6</sub>  | 302.07904 | 1.34 | 301.07179 | 283.06204;<br>267.06650;<br>252.04286;<br>151.00266;<br>125.02319               |
| pinostrobin                                 | 17.40 | C <sub>16</sub> H <sub>14</sub> O <sub>4</sub>  | 270.08921 | 1.89 | 269.08196 | 254.05864;<br>210.06839;<br>177.05495;<br>148.01559                             |
| chrysin                                     | 17.63 | C <sub>15</sub> H <sub>10</sub> O <sub>4</sub>  | 254.05791 | 1.65 | 253.05066 | 208.96011;<br>151.03899;<br>107.04897;<br>89.04897; 65.03819                    |
| myricetin                                   | 10.42 | C <sub>15</sub> H <sub>10</sub> O <sub>8</sub>  | 318.03757 | 1.37 | 317.03032 | 178.99860;<br>164.92636;<br>151.00368;<br>137.02442;<br>107.01258               |
| galangin                                    | 19.98 | C <sub>15</sub> H <sub>10</sub> O <sub>5</sub>  | 270.05282 | 1.48 | 269.04557 | 239.03345;<br>227.03389;<br>225.05580;<br>211.03877;<br>169.06425               |
| hyperoside<br>(quercetin-3-<br>galactoside) | 13.98 | C <sub>21</sub> H <sub>20</sub> O <sub>12</sub> | 464.09548 | 1.03 | 463.08768 | 300.02771;<br>355.02985;<br>271.02491;<br>243.02969;<br>178.99773;<br>151.00262 |
| genistin                                    | 12.56 | C <sub>21</sub> H <sub>20</sub> O <sub>10</sub> | 432.10565 | 1.45 | 431.09837 | 311.05637;<br>269.04590;<br>271.05133;<br>181.06580                             |
| genistein                                   | 18.07 | C <sub>15</sub> H <sub>10</sub> O <sub>5</sub>  | 270.05282 | 1.24 | 269.04502 | 159.04420;<br>133.02835;<br>201.05527;<br>181.06546;<br>107.01257               |
| daidzin                                     | 11.42 | C <sub>21</sub> H <sub>20</sub> O <sub>9</sub>  | 416.11073 | 1.49 | 415.10348 | 252.0451; 251.0349;<br>224.0487; 223.0398                                       |
| daidzein                                    | 16.50 | C <sub>15</sub> H <sub>10</sub> O <sub>4</sub>  | 254.05791 | 0.87 | 253.05066 | 226.05887;<br>224.04649;                                                        |

|                       |       |                                                |           |      |           |                                                                   |
|-----------------------|-------|------------------------------------------------|-----------|------|-----------|-------------------------------------------------------------------|
|                       |       |                                                |           |      |           | 209.06091;<br>197.06055;<br>135.00686;<br>117.03333               |
| ononin                | 26.14 | C <sub>22</sub> H <sub>22</sub> O <sub>9</sub> | 430.12638 | 2.06 | 429.11913 | 355.0969; 341.1109;<br>267.10280;<br>252.00778                    |
| formononetin          | 18.74 | C <sub>16</sub> H <sub>12</sub> O <sub>4</sub> | 268.07356 | 1.19 | 267.06631 | 252.04298;<br>223.03986;<br>195.04466;<br>132.02049               |
| glycitein             | 16.33 | C <sub>16</sub> H <sub>12</sub> O <sub>5</sub> | 284.06847 | 1.18 | 283.06122 | 268.0375; 240.0483;<br>211.03979;<br>196.05252;<br>167.02063      |
| <b>Phenolic acids</b> |       |                                                |           |      |           |                                                                   |
| gallic acid           | 1.73  | C <sub>7</sub> H <sub>6</sub> O <sub>5</sub>   | 170.02152 | 0.16 | 169.01427 | 125.02318;<br>141.01823                                           |
| chlorogenic acid      | 8.20  | C <sub>16</sub> H <sub>18</sub> O <sub>9</sub> | 354.09508 | 0.24 | 353.08783 | 192.05876;<br>191.05544;<br>173.04474;<br>127.03876;<br>85.02806  |
| caffeic acid          | 8.71  | C <sub>9</sub> H <sub>8</sub> O <sub>4</sub>   | 180.04226 | 0.37 | 179.03501 | 135.04390;<br>107.04881                                           |
| ferulic acid          | 14.98 | C <sub>10</sub> H <sub>10</sub> O <sub>4</sub> | 194.05791 | 0.62 | 193.05066 | 178.02635;<br>149.05974;<br>134.03615;<br>106.04240               |
| ellagic acid          | 14.44 | C <sub>14</sub> H <sub>6</sub> O <sub>8</sub>  | 302.00627 | 1.62 | 300.99899 | 185.02349;<br>283.98961;<br>229.01391;<br>157.01006               |
| abscisic acid         | 15.73 | C <sub>15</sub> H <sub>20</sub> O <sub>4</sub> | 264.13616 | 1.42 | 263.12891 | 263.12854;<br>219.13864;<br>204.11502;<br>153.09126;<br>136.05162 |
| p-coumaric acid       | 10.77 | C <sub>9</sub> H <sub>8</sub> O <sub>3</sub>   | 164.04734 | 0.18 | 163.03954 | 211.07640;<br>135.00754;<br>119.05020;<br>17.03320;<br>116.02670  |
| syringic acid         | 15.38 | C <sub>9</sub> H <sub>10</sub> O <sub>5</sub>  | 198.05282 | 0.41 | 197.04555 | 182.02049;<br>123.00697;<br>166.99693                             |

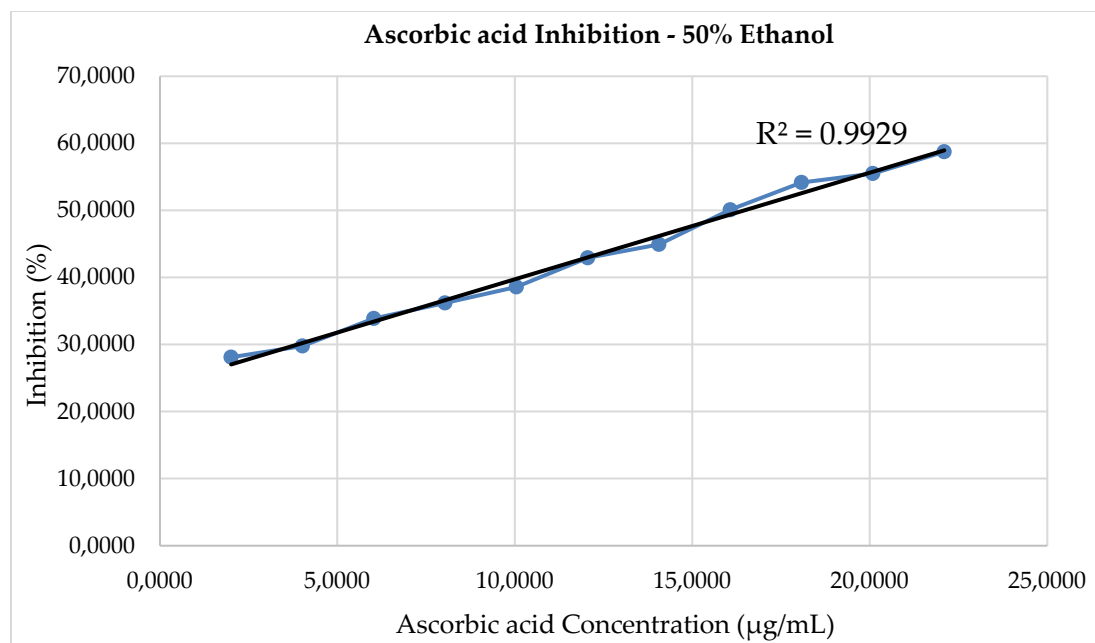

**Figure S23.** Calibration curve for ascorbic acid (vitamin C) - Antioxidant action in 50% Ethanol.

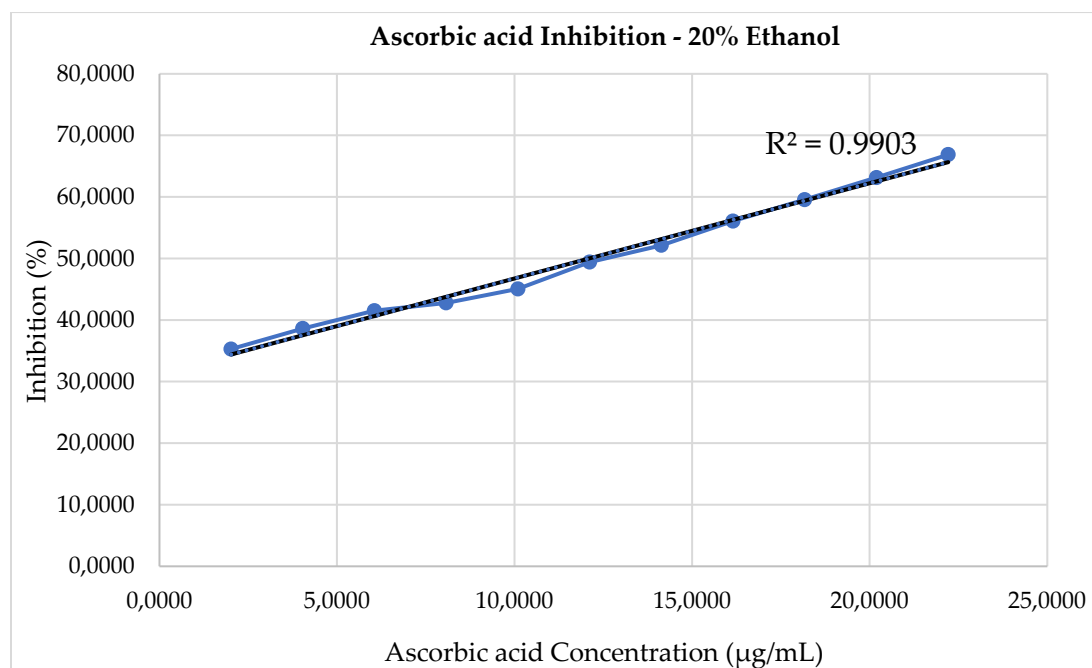

**Figure S24.** Calibration curve for ascorbic acid (vitamin C) - Antioxidant action in 20% Ethanol.
